## Correction

# Correction: Simvastatin Inhibits Glucose Metabolism and Legumain Activity in Human Myotubes

The *PLOS ONE* Staff

The affiliation for the seventh author is incorrect. Harald Thidemann Johansen is not affiliated with #2 but with #1 Department of Pharmaceutical Bioscience, School of Pharmacy, Faculty of Mathematics and Natural Sciences, University of Oslo.

## Reference

1. Smith R, Solberg R, Jacobsen LL, Voreland AL, Rustan AC, et al. (2014) Simvastatin Inhibits Glucose Metabolism and Legumain Activity in Human Myotubes. *PLoS ONE* 9(1): e85721. doi:10.1371/journal.pone.0085721

**Citation:** The *PLOS ONE* Staff (2014) Correction: Simvastatin Inhibits Glucose Metabolism and Legumain Activity in Human Myotubes. *PLoS ONE* 9(3): e93202. doi:10.1371/journal.pone.0093202

**Published:** March 20, 2014

**Copyright:** © 2014 The *PLOS ONE* Staff. This is an open-access article distributed under the terms of the Creative Commons Attribution License, which permits unrestricted use, distribution, and reproduction in any medium, provided the original author and source are credited.
